# Supplementary material for: Investigation of α,ω-Disubstituted Polyamine-Cholic Acid Conjugates Identifies Hyodeoxycholic and Chenodeoxycholic Scaffolds as Non-Toxic, Potent Antimicrobials
Source: MDPI journal article supplement (doi:10.3390/antibiotics12020404), 2023-02-17
Supplement: s1 [file s1]

# Supporting Information

## Investigation of $\alpha,\omega$ -disubstituted polyamine-cholic acid conjugates identifies hyodeoxycholic and chenodeoxycholic scaffolds as non-toxic, potent antimicrobials

Kenneth Sue <sup>1</sup>, Melissa M. Cadelis <sup>1</sup>, Thomas Troia <sup>2</sup>, Florent Rouvier <sup>2</sup>, Marie-Lise Bourguet-Kondracki <sup>3</sup>, Jean Michel Brunel <sup>2</sup> and Brent R. Copp <sup>1,\*</sup>

<sup>1</sup> School of Chemical Sciences, The University of Auckland, Private Bag 92019, Auckland 1142, New Zealand; ksue827@aucklanduni.ac.nz (K.S.); m.cadelis@auckland.ac.nz (M.M.C.); b.copp@auckland.ac.nz (B.C)

<sup>2</sup> UMR MD1 "Membranes et Cibles Therapeutiques", U1261 INSERM, Faculté de Pharmacie, Aix-Marseille Université, 27 bd Jean Moulin, 13385 Marseille, France; troia.thomas@gmail.com (T.T.); rouv.flo@hotmail.fr (F.R.); jean-michel.brunel@inserm.fr (J.M.B.)

<sup>3</sup> Laboratoire Molécules de Communication et Adaptation des Micro-organismes, UMR 7245 CNRS, Muséum National d'Histoire Naturelle, 57 rue Cuvier (C.P. 54), 75005 Paris, France; marie-lise.bourguet@mnhn.fr (M-L.B-K)

\* Correspondence: b.copp@auckland.ac.nz

### Contents

|                                                                                                                                                                  |     |
|------------------------------------------------------------------------------------------------------------------------------------------------------------------|-----|
| <b>Figure S1</b> <sup>1</sup> H (DMSO- <i>d</i> <sub>6</sub> , 400 MHz) and <sup>13</sup> C (DMSO- <i>d</i> <sub>6</sub> , 100 MHz) NMR spectra for <b>7a</b> .  | S2  |
| <b>Figure S2</b> <sup>1</sup> H (DMSO- <i>d</i> <sub>6</sub> , 400 MHz) and <sup>13</sup> C (DMSO- <i>d</i> <sub>6</sub> , 100 MHz) NMR spectra for <b>7b</b> .  | S3  |
| <b>Figure S3</b> <sup>1</sup> H (DMSO- <i>d</i> <sub>6</sub> , 400 MHz) and <sup>13</sup> C (DMSO- <i>d</i> <sub>6</sub> , 100 MHz) NMR spectra for <b>7c</b> .  | S4  |
| <b>Figure S4</b> <sup>1</sup> H (DMSO- <i>d</i> <sub>6</sub> , 400 MHz) and <sup>13</sup> C (DMSO- <i>d</i> <sub>6</sub> , 100 MHz) NMR spectra for <b>7d</b> .  | S5  |
| <b>Figure S5</b> <sup>1</sup> H (DMSO- <i>d</i> <sub>6</sub> , 400 MHz) and <sup>13</sup> C (DMSO- <i>d</i> <sub>6</sub> , 100 MHz) NMR spectra for <b>7e</b> .  | S6  |
| <b>Figure S6</b> <sup>1</sup> H (DMSO- <i>d</i> <sub>6</sub> , 400 MHz) and <sup>13</sup> C (DMSO- <i>d</i> <sub>6</sub> , 100 MHz) NMR spectra for <b>7f</b> .  | S7  |
| <b>Figure S7</b> <sup>1</sup> H (DMSO- <i>d</i> <sub>6</sub> , 400 MHz) and <sup>13</sup> C (DMSO- <i>d</i> <sub>6</sub> , 100 MHz) NMR spectra for <b>8a</b> .  | S8  |
| <b>Figure S8</b> <sup>1</sup> H (DMSO- <i>d</i> <sub>6</sub> , 400 MHz) and <sup>13</sup> C (DMSO- <i>d</i> <sub>6</sub> , 100 MHz) NMR spectra for <b>8b</b> .  | S9  |
| <b>Figure S9</b> <sup>1</sup> H (DMSO- <i>d</i> <sub>6</sub> , 400 MHz) and <sup>13</sup> C (DMSO- <i>d</i> <sub>6</sub> , 100 MHz) NMR spectra for <b>8c</b> .  | S10 |
| <b>Figure S10</b> <sup>1</sup> H (DMSO- <i>d</i> <sub>6</sub> , 400 MHz) and <sup>13</sup> C (DMSO- <i>d</i> <sub>6</sub> , 100 MHz) NMR spectra for <b>8d</b> . | S11 |
| <b>Figure S11</b> <sup>1</sup> H (DMSO- <i>d</i> <sub>6</sub> , 400 MHz) and <sup>13</sup> C (DMSO- <i>d</i> <sub>6</sub> , 100 MHz) NMR spectra for <b>8e</b> . | S12 |
| <b>Figure S12</b> <sup>1</sup> H (DMSO- <i>d</i> <sub>6</sub> , 400 MHz) and <sup>13</sup> C (DMSO- <i>d</i> <sub>6</sub> , 100 MHz) NMR spectra for <b>8f</b> . | S13 |
| <b>Figure S13</b> <sup>1</sup> H (DMSO- <i>d</i> <sub>6</sub> , 400 MHz) and <sup>13</sup> C (DMSO- <i>d</i> <sub>6</sub> , 100 MHz) NMR spectra for <b>9a</b> . | S14 |

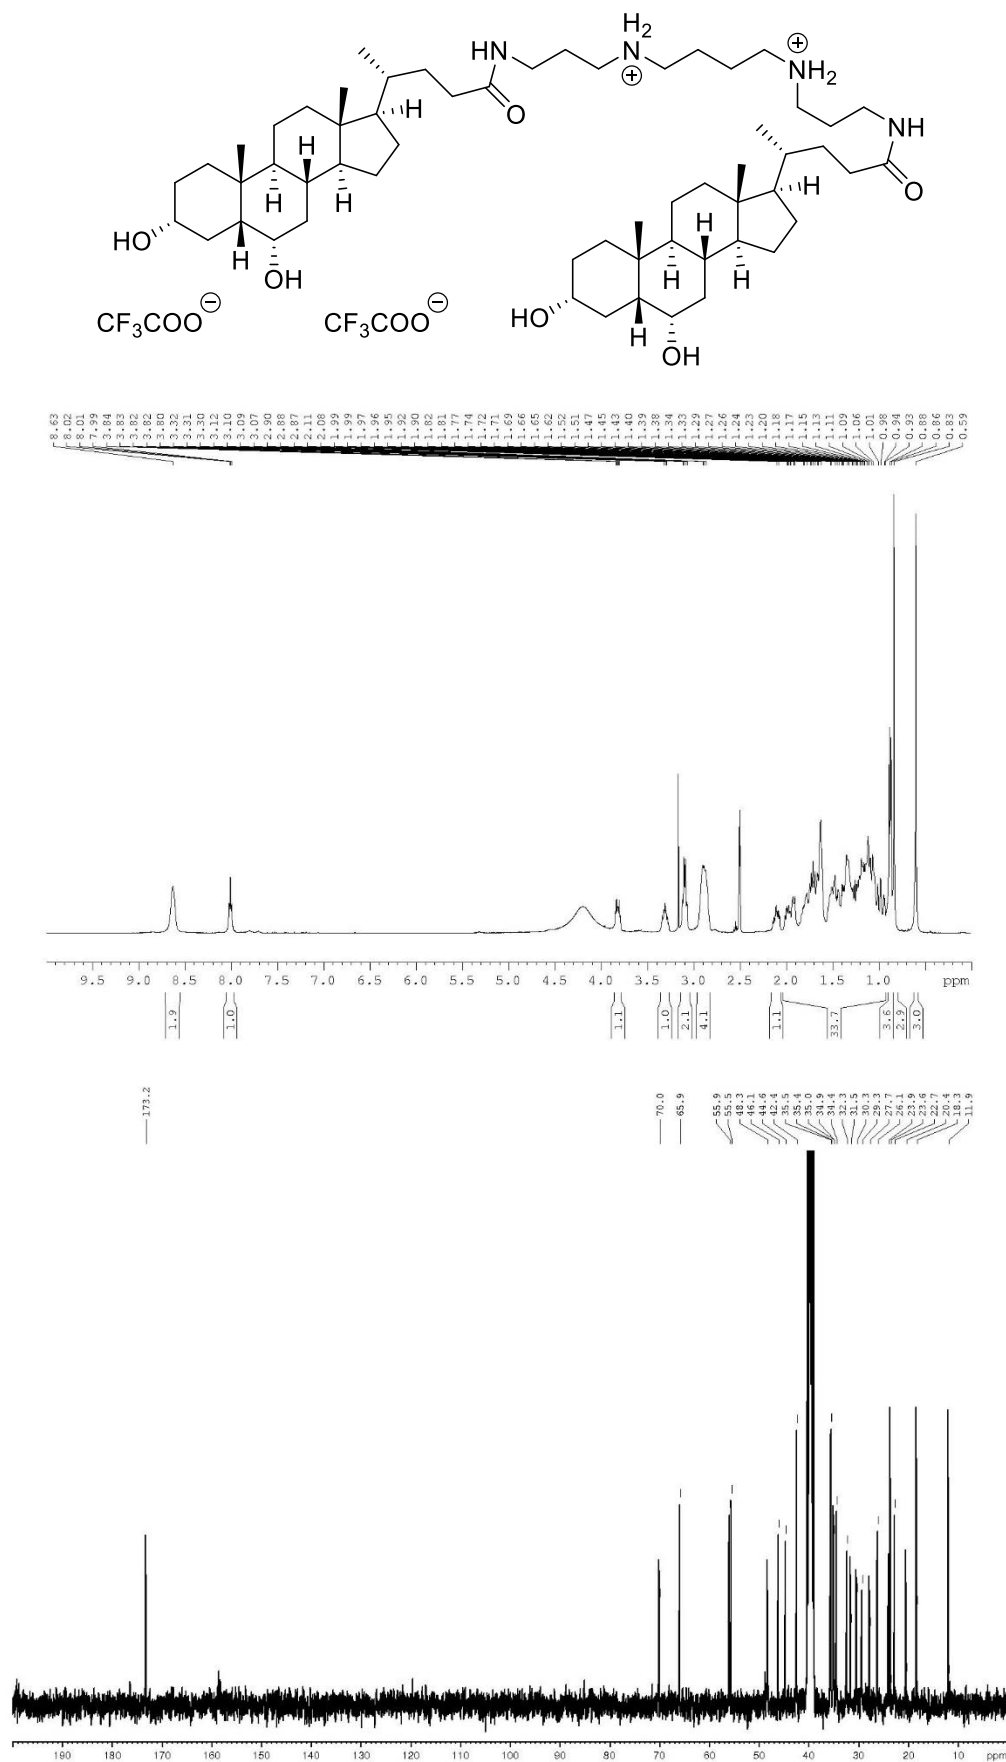

**Figure S1**  $^1\text{H}$  ( $\text{DMSO-}d_6$ , 400 MHz) and  $^{13}\text{C}$  ( $\text{DMSO-}d_6$ , 100 MHz) NMR spectra for **7a**.



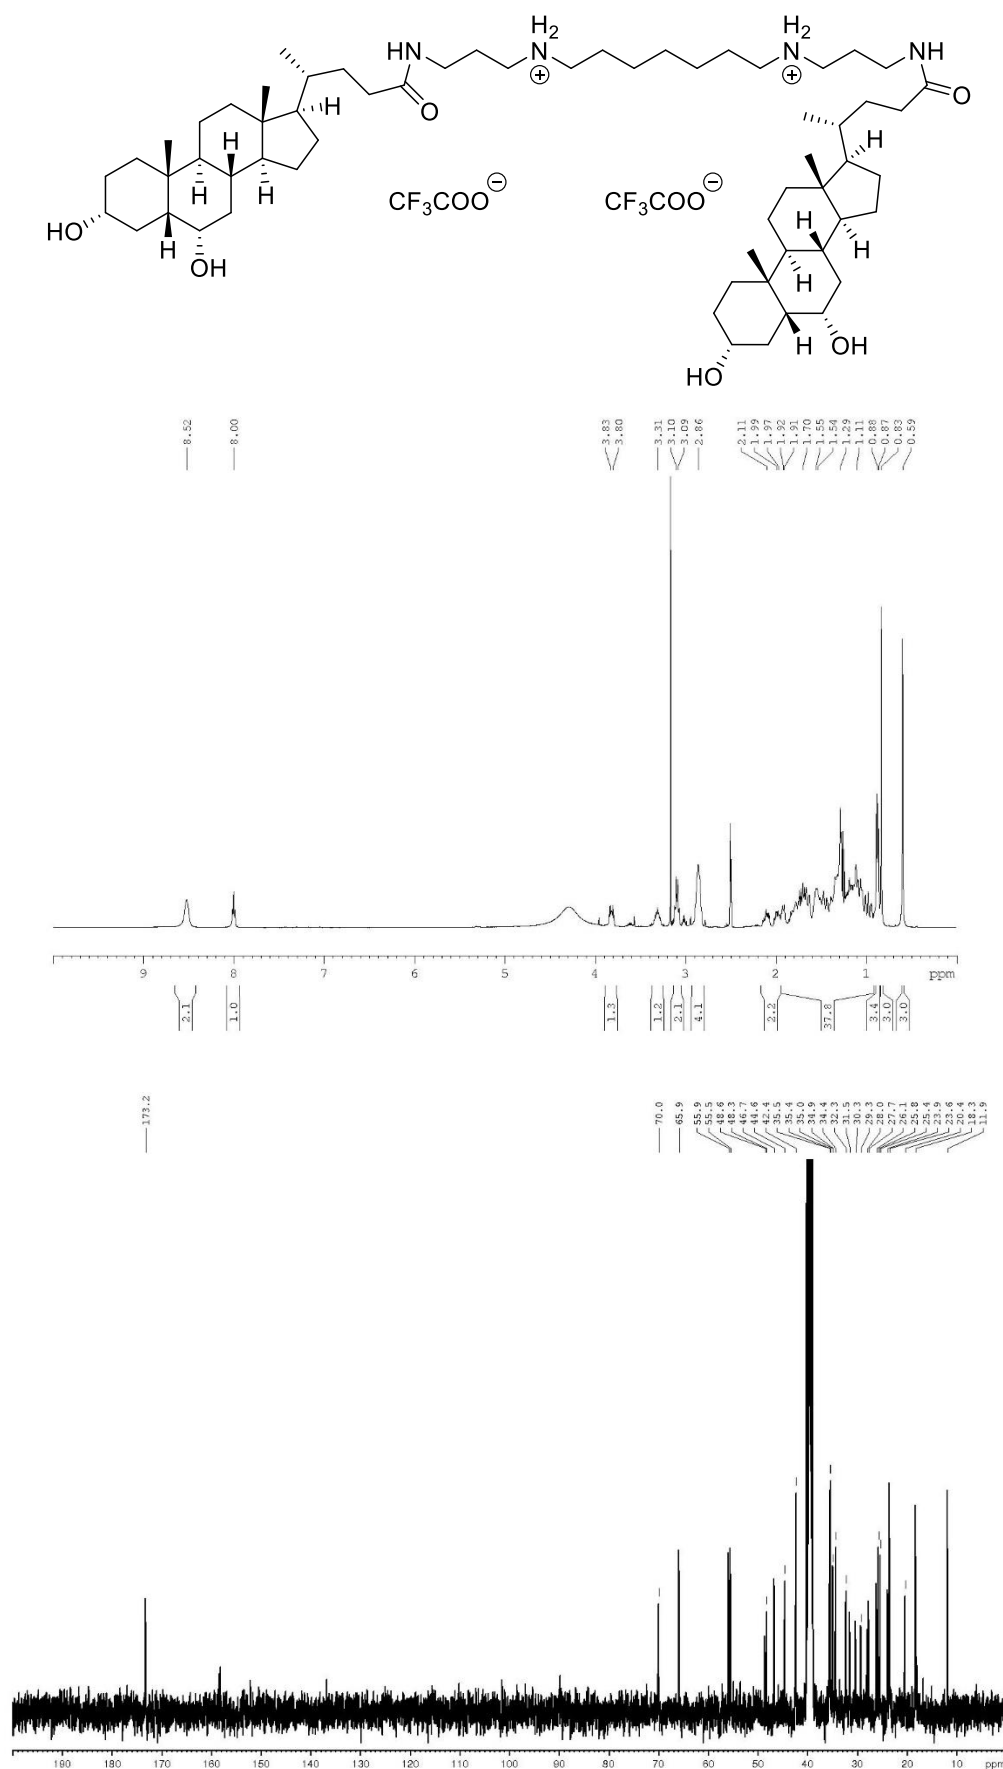

**Figure S3** <sup>1</sup>H (DMSO-*d*<sub>6</sub>, 400 MHz) and <sup>13</sup>C (DMSO-*d*<sub>6</sub>, 100 MHz) NMR spectra for **7c**.

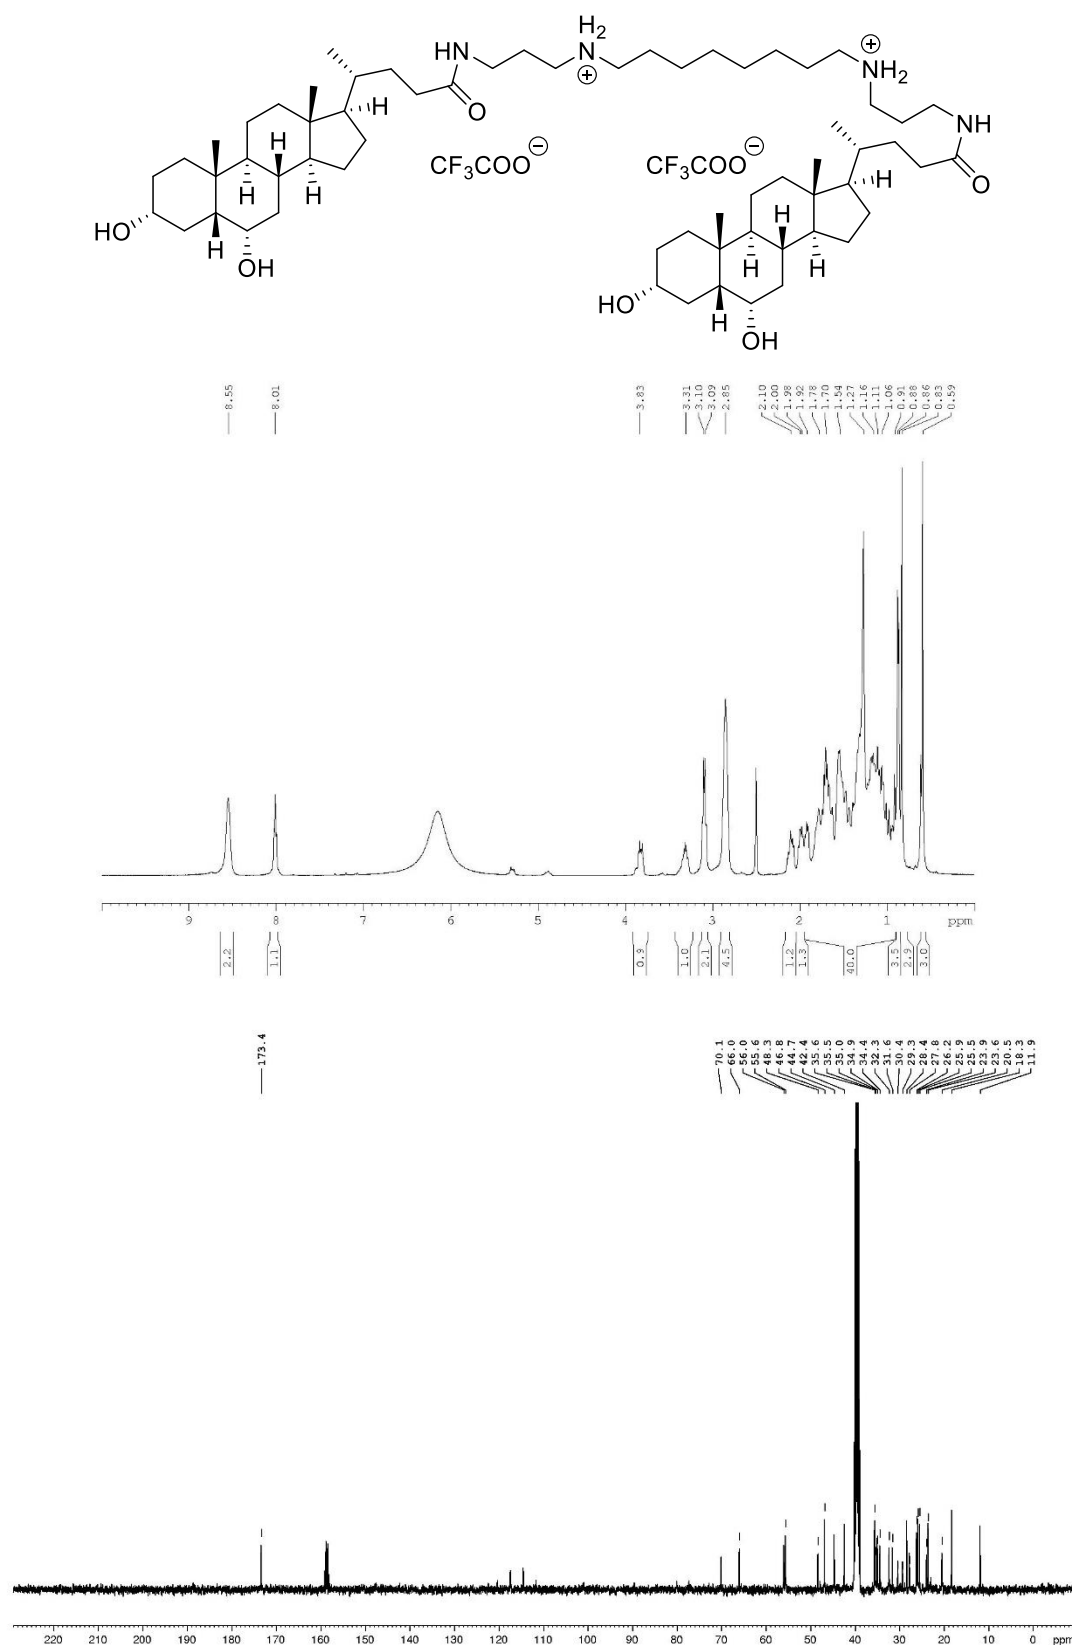

**Figure S4** <sup>1</sup>H (DMSO-*d*<sub>6</sub>, 400 MHz) and <sup>13</sup>C (DMSO-*d*<sub>6</sub>, 100 MHz) NMR spectra for **7d**.

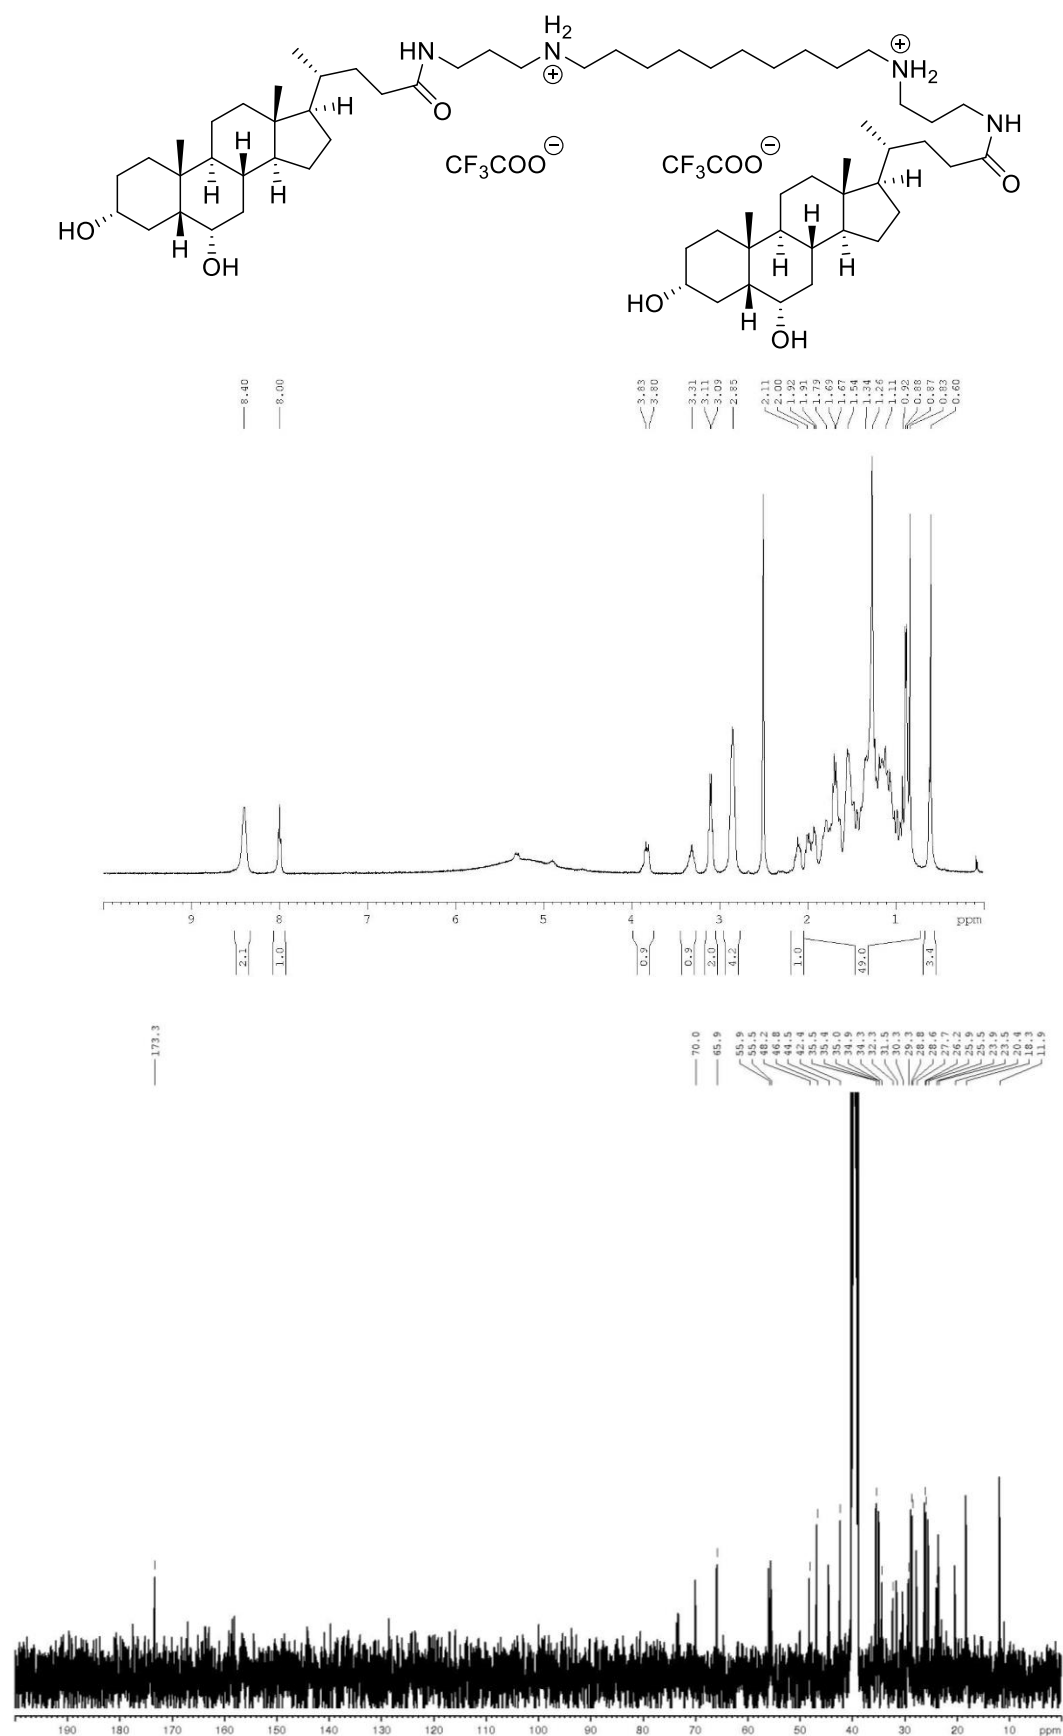

**Figure S5**  $^1\text{H}$  ( $\text{DMSO-}d_6$ , 400 MHz) and  $^{13}\text{C}$  ( $\text{DMSO-}d_6$ , 100 MHz) NMR spectra for **7e**.

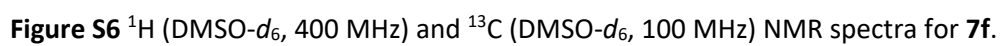

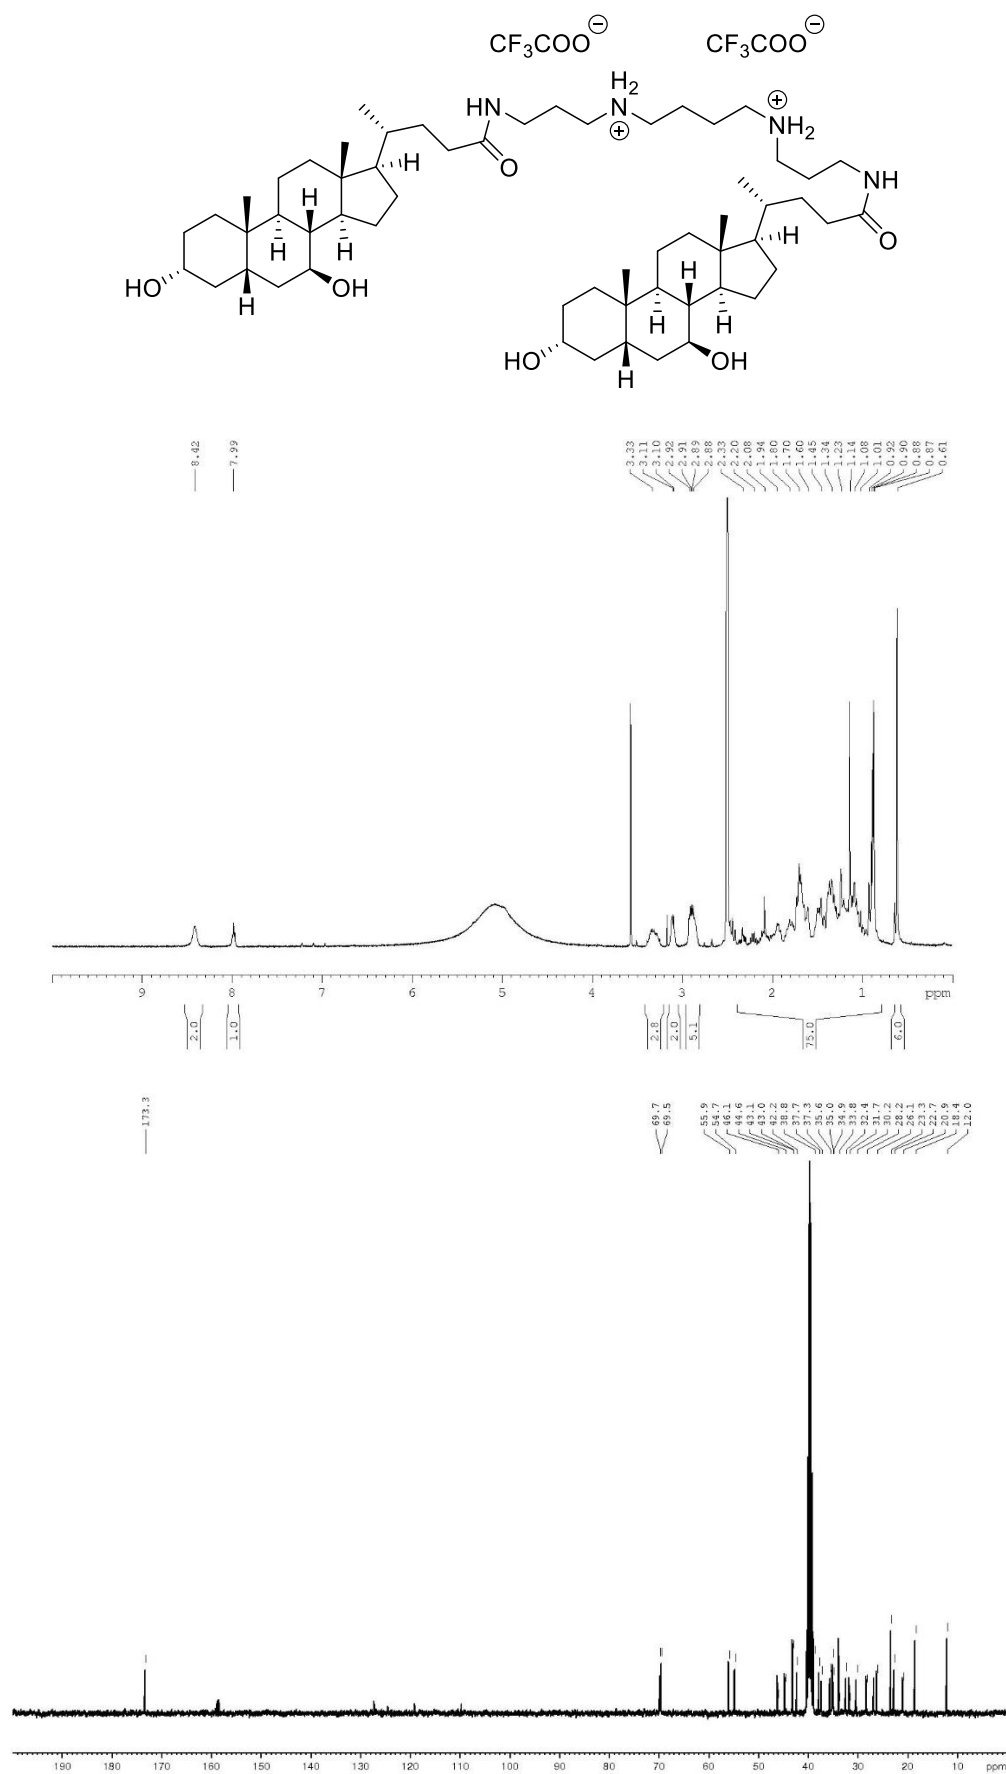

**Figure S7**  $^1\text{H}$  (DMSO- $d_6$ , 400 MHz) and  $^{13}\text{C}$  (DMSO- $d_6$ , 100 MHz) NMR spectra for **8a**.



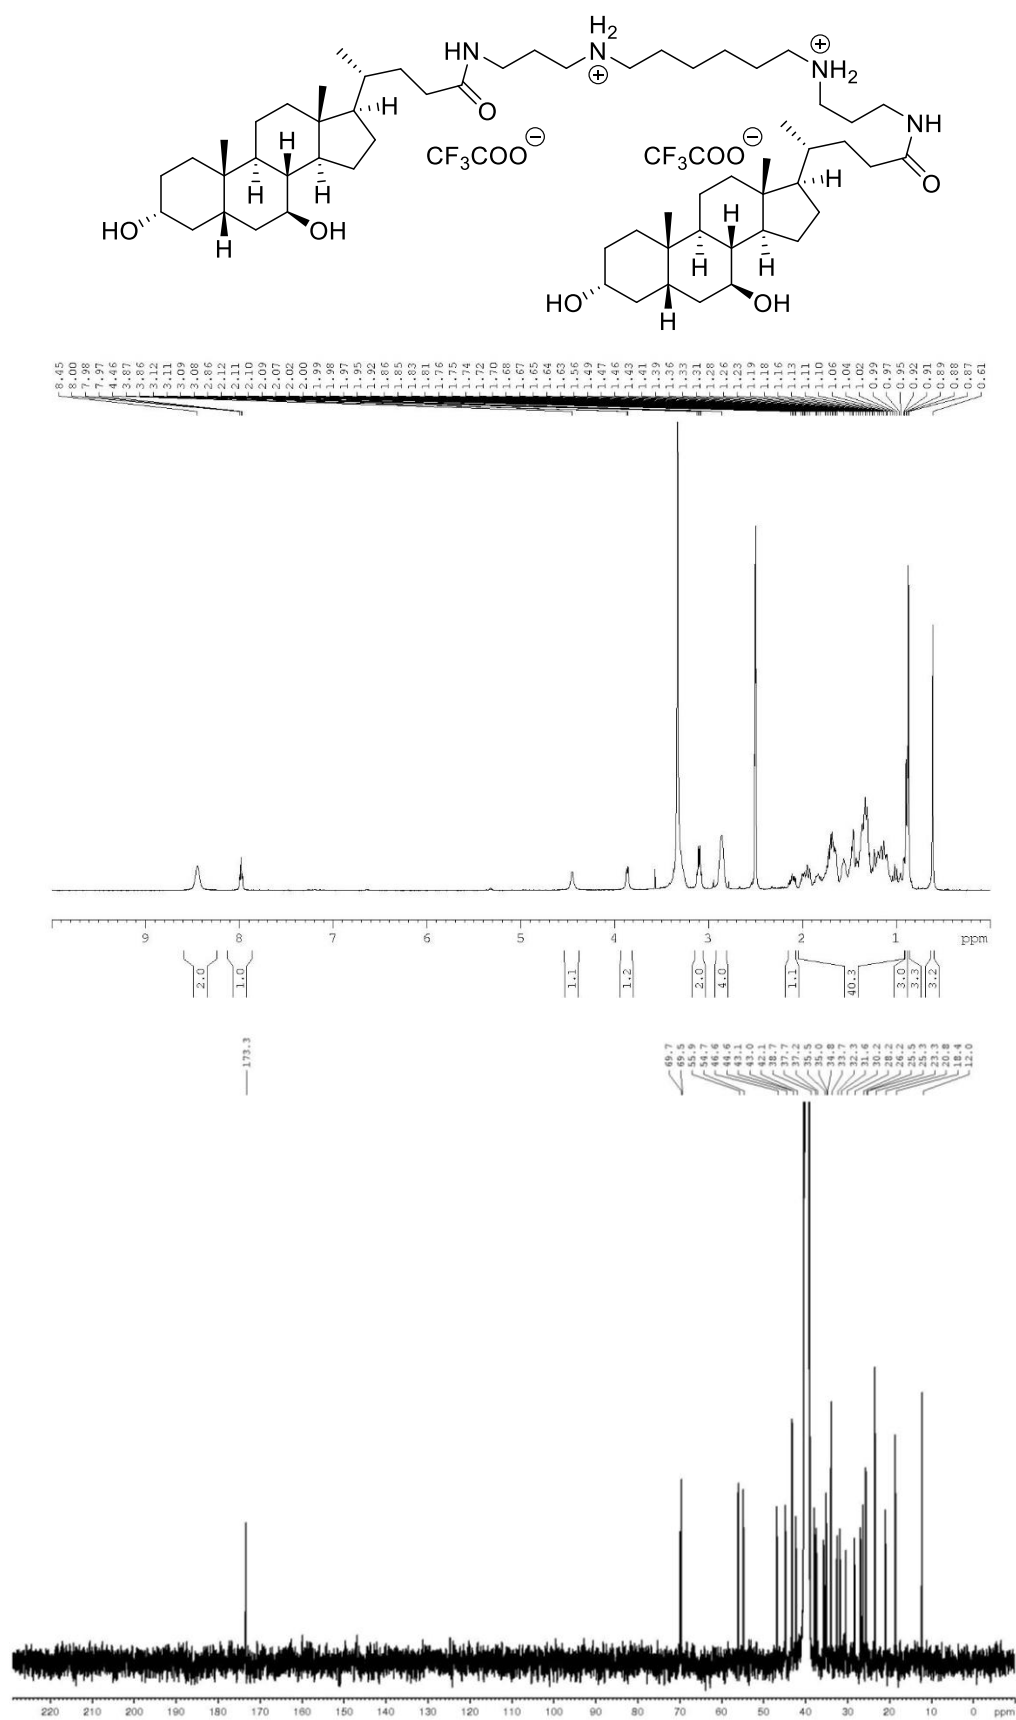

**Figure S8** <sup>1</sup>H (DMSO-*d*<sub>6</sub>, 400 MHz) and <sup>13</sup>C (DMSO-*d*<sub>6</sub>, 100 MHz) NMR spectra for **8b**.

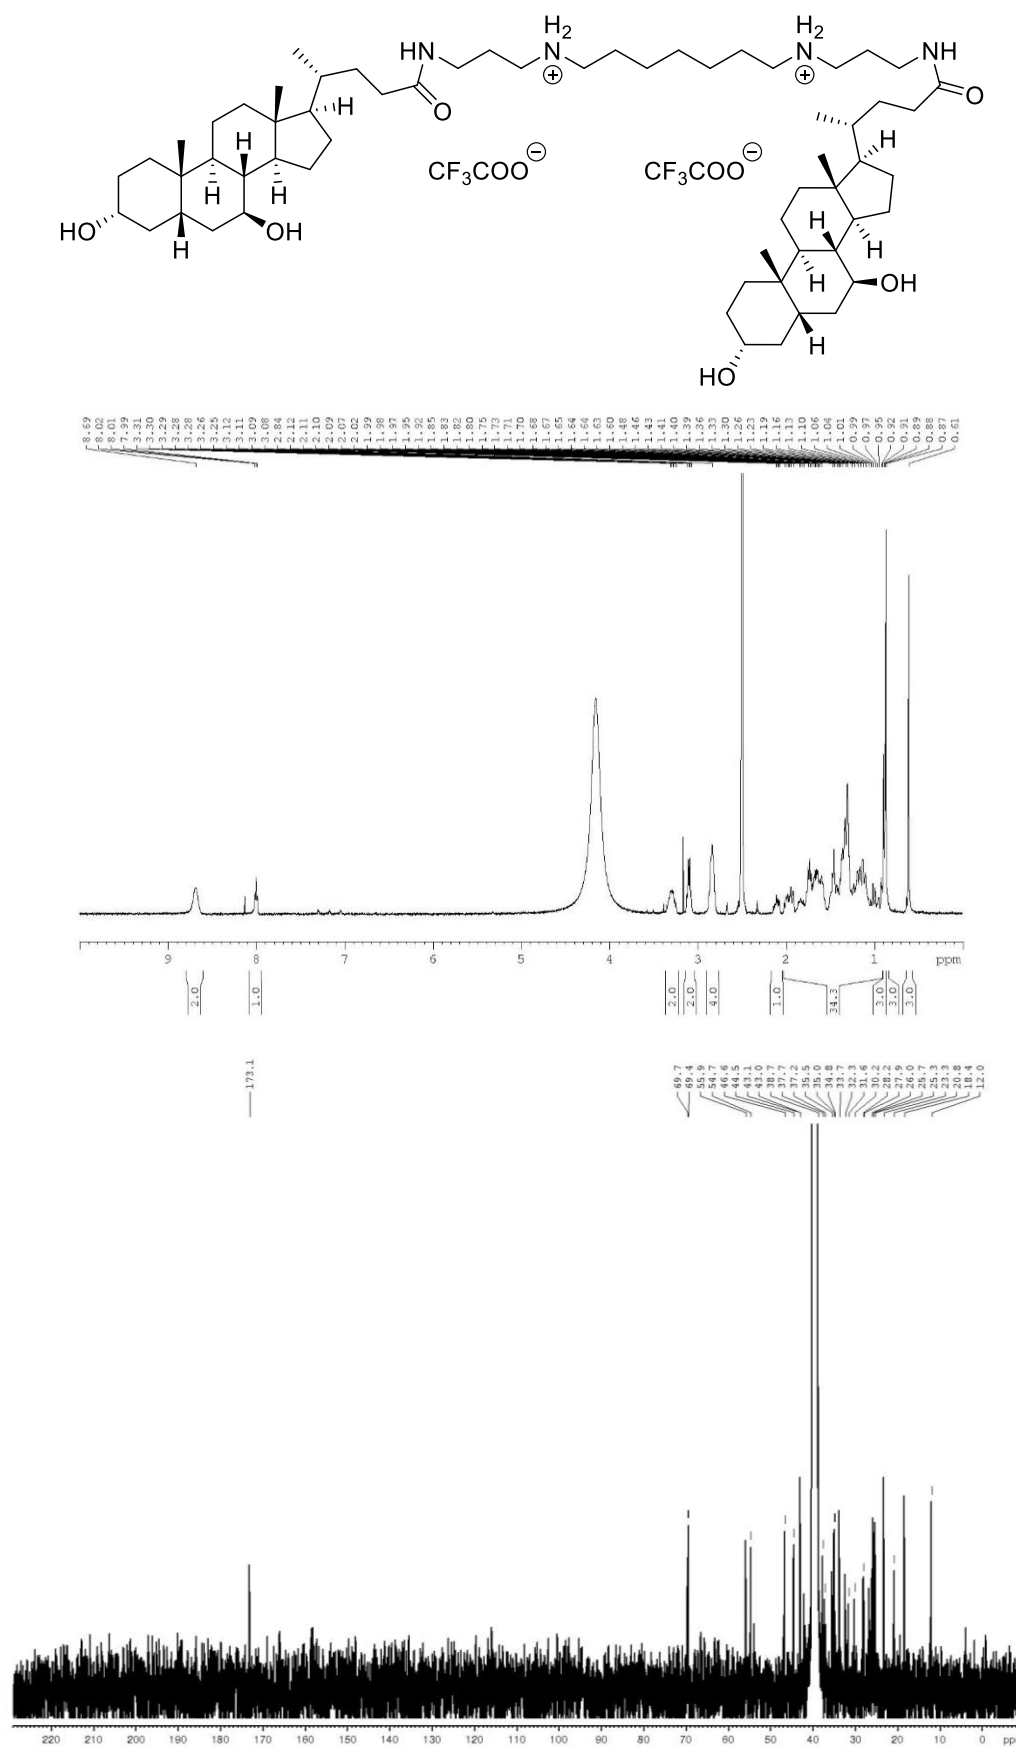

**Figure S9** <sup>1</sup>H (DMSO-*d*<sub>6</sub>, 400 MHz) and <sup>13</sup>C (DMSO-*d*<sub>6</sub>, 100 MHz) NMR spectra for **8c**.

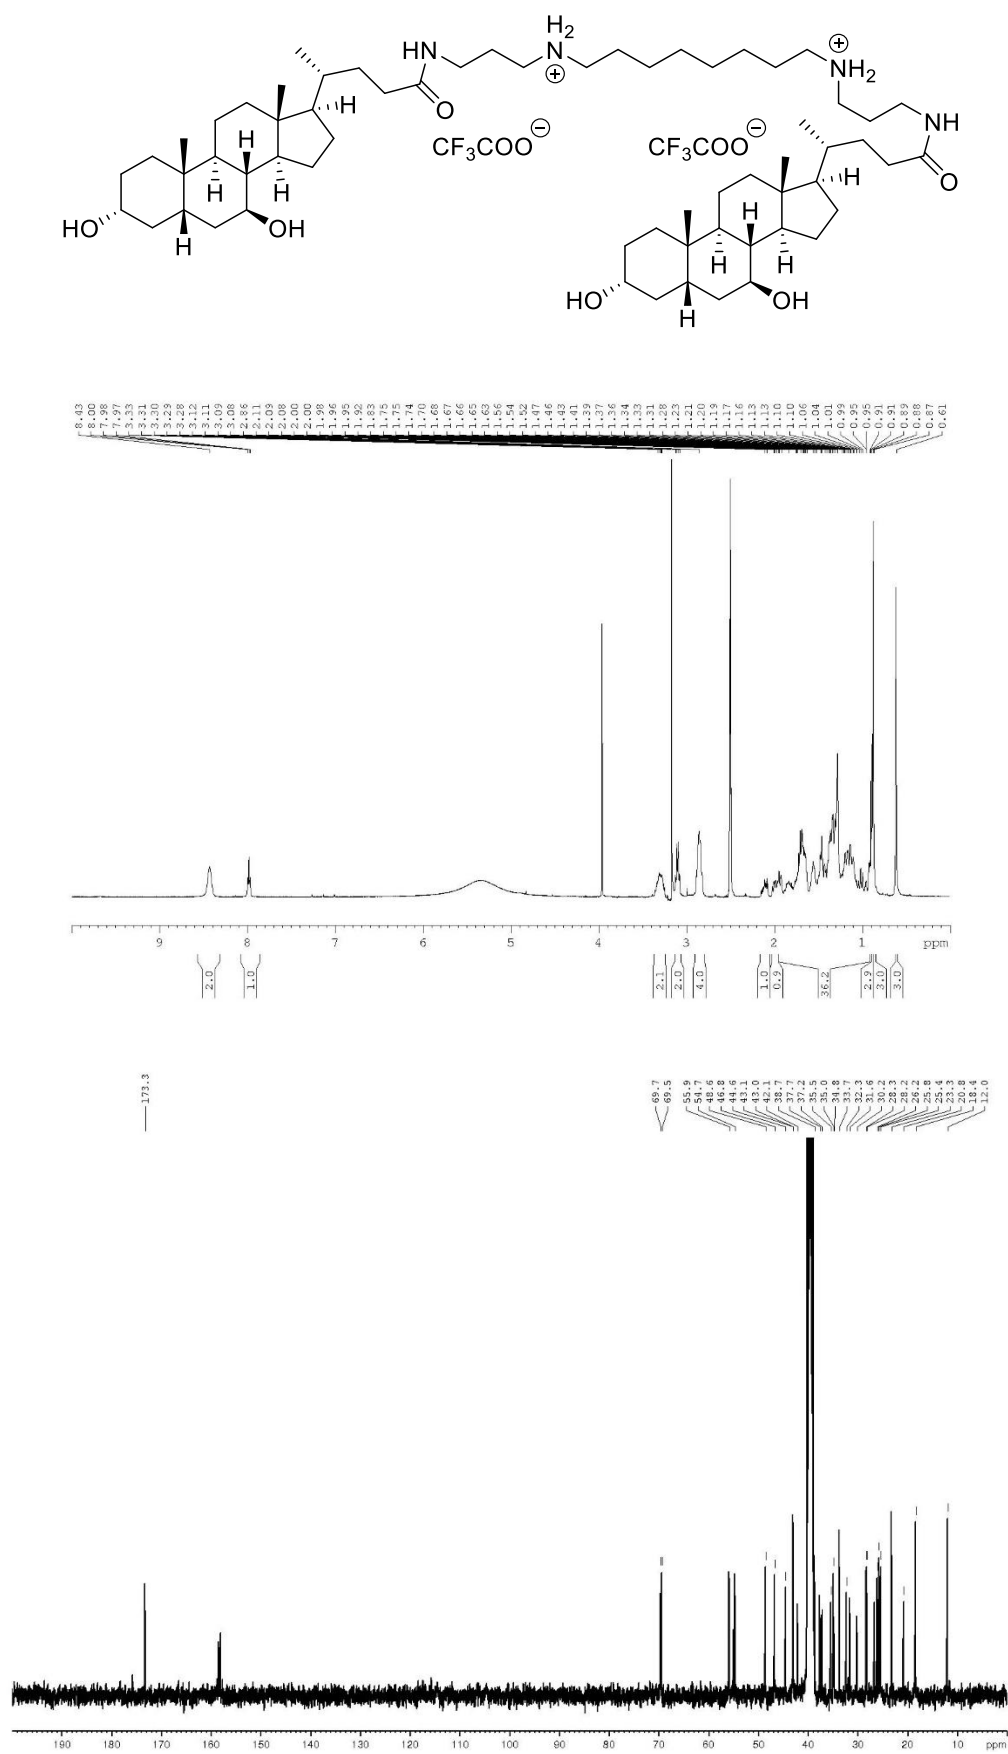

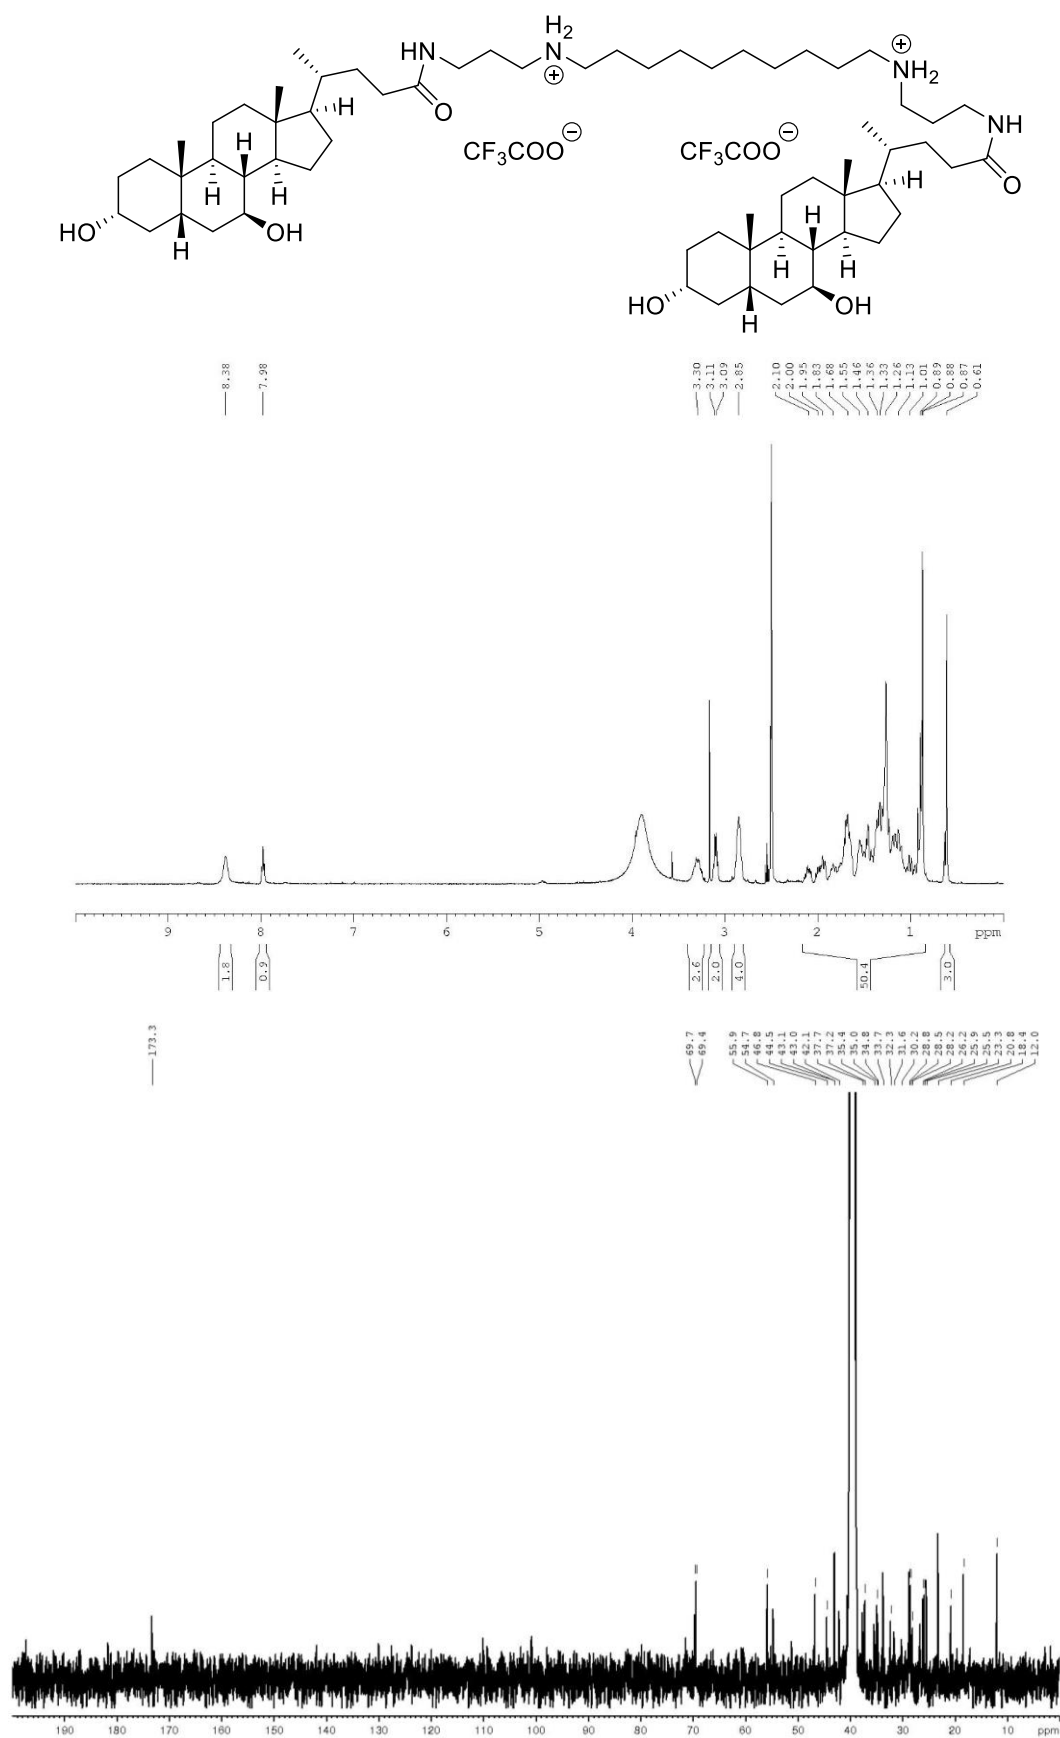

**Figure S11** <sup>1</sup>H (DMSO-*d*<sub>6</sub>, 400 MHz) and <sup>13</sup>C (DMSO-*d*<sub>6</sub>, 100 MHz) NMR spectra for **8e**.

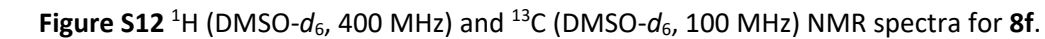

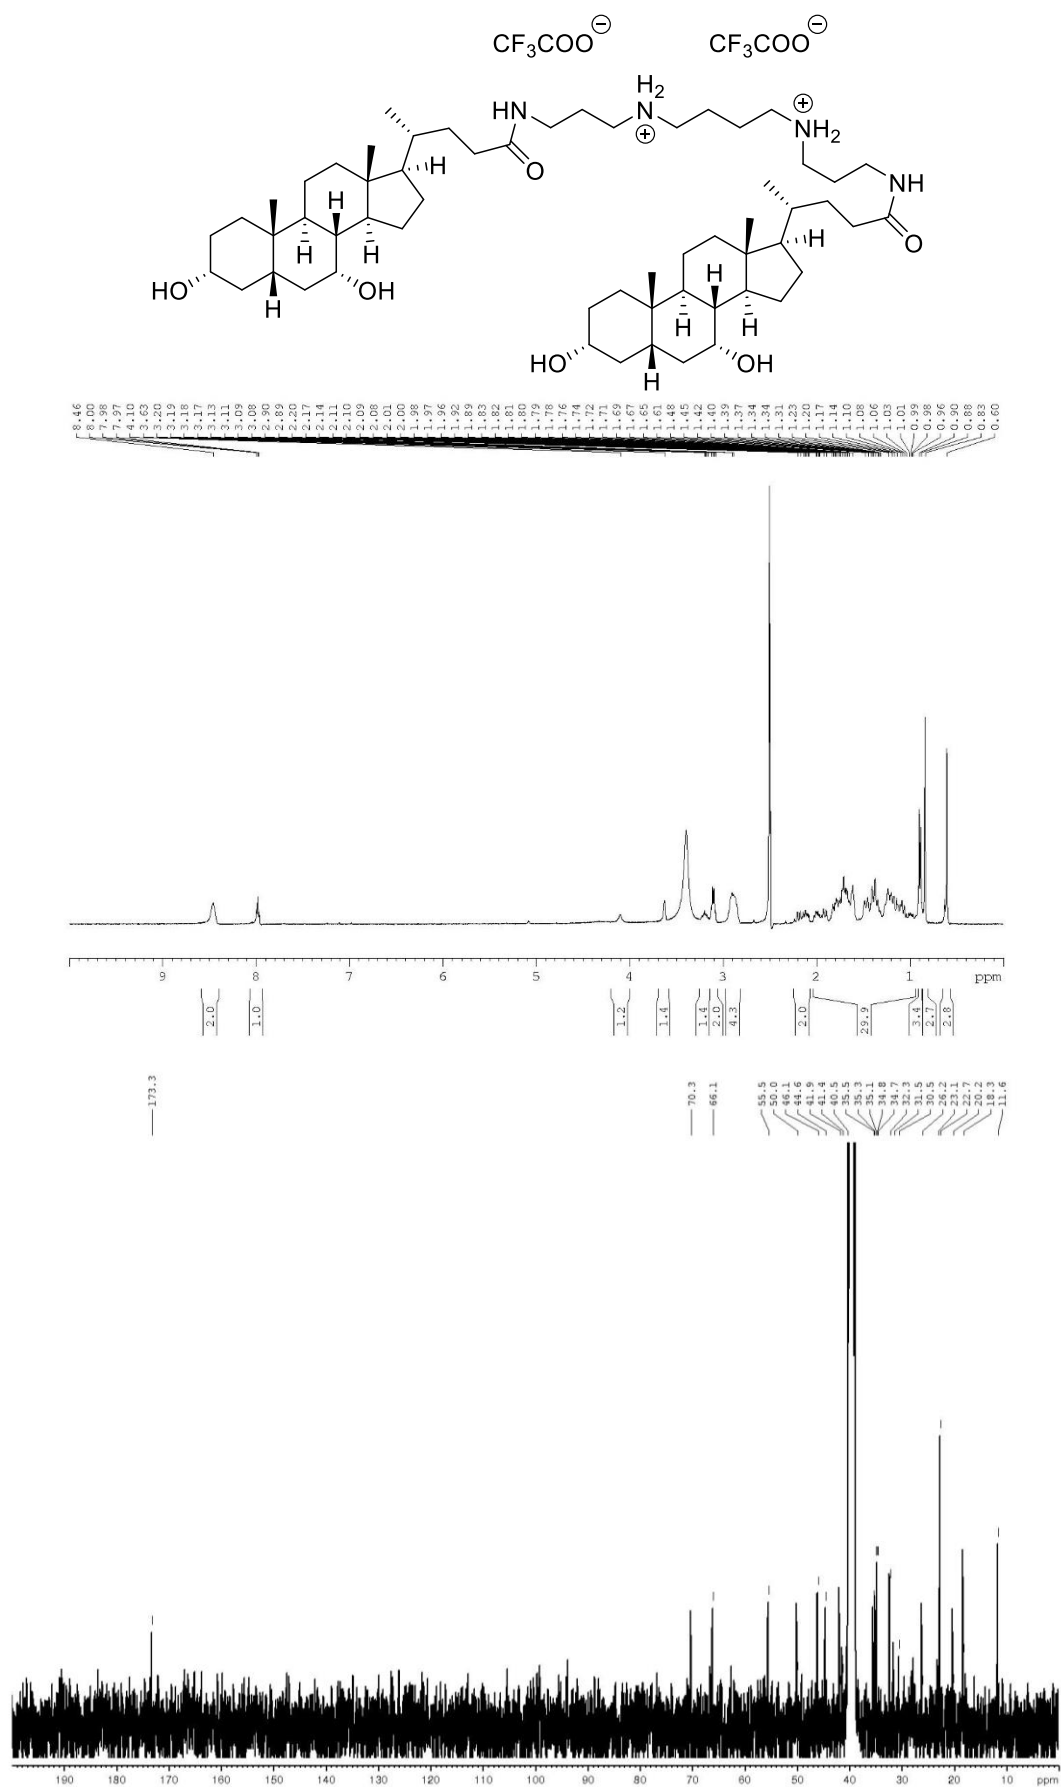

**Figure S13**  $^1\text{H}$  (DMSO- $d_6$ , 400 MHz) and  $^{13}\text{C}$  (DMSO- $d_6$ , 100 MHz) NMR spectra for **9a**.
